# Supplementary material for: Apremilast Prolongs the Time to First Biologic Therapy in Japanese Patients with Psoriasis
Source: Springer Nature journal article supplement (doi:10.1007/s13555-021-00659-w), 2021-12-24
Supplement: MOESM1 [file 19975490]

## **SUPPLEMENTARY MATERIAL**

### **Apremilast Prolongs the Time to First Biologic Therapy in Japanese Patients With Psoriasis**

Masayuki Tanaka, Yasushi Ozeki, Fujio Matsuyama, Tatsunori Murata,  
Shinichi Imafuku, Taichi Nakamura

M. Tanaka, Y. Ozeki, T. Nakamura  
Inflammation and Immunology, General Medicine, Medical Affairs,  
Research & Development, Amgen KK, Tokyo, Japan

F. Matsuyama, T. Murata  
Crecon Medical Assessment Inc., Tokyo, Japan

S. Imafuku  
Fukuoka University, Fukuoka, Japan

#### **Correspondence:**

Masayuki Tanaka, PhD  
Amgen K.K.  
Midtown Tower 9-7-1 Akasaka  
Minato-ku, Tokyo, Japan  
Telephone: +81-3-5293-9629.  
email: [mtanak02@amgen.com](mailto:mtanak02@amgen.com)

## **Supplemental Methods**

### **A. Sensitivity Analysis**

The database does not contain information on disease severity. Disease severity could affect the efficacy and duration of treatment before initiation of biologic therapy, thereby influencing the occurrence and timing of the first biologic therapy use. This could be a major source of bias if the severity was different between the two treatment groups. To help to overcome this bias, the time to first biologic therapy use was analyzed by extracting a subset of eligible patients who were prescribed biologics during the follow-up period from both treatment groups. Instead of matching, an inverse probability of treatment weighting (IPTW) method using propensity scores was also performed as a sensitivity analysis. A stabilization weighting factor, which is the percentage of each group in the overall population multiplied by the IPTW of each group, was used for weighting. The upper limit of the stabilization weighting factor was set to 10, and patients with a propensity score  $<0.005$  or  $>0.9$  were excluded from the analysis to prevent the results from being significantly affected by patients with an extremely large weighting factor.

**Fig. S1.** Mean psoriasis costs per month of (A) topical agents, (B) phototherapy, (C), oral agents, (D) MTX, (E) biologic therapy, (F) other agents for psoriasis, (G) other agents, (H) other treatment procedures, (I) tests, (J) hospitalization, and (K) total medical expenses. *MTX* methotrexate

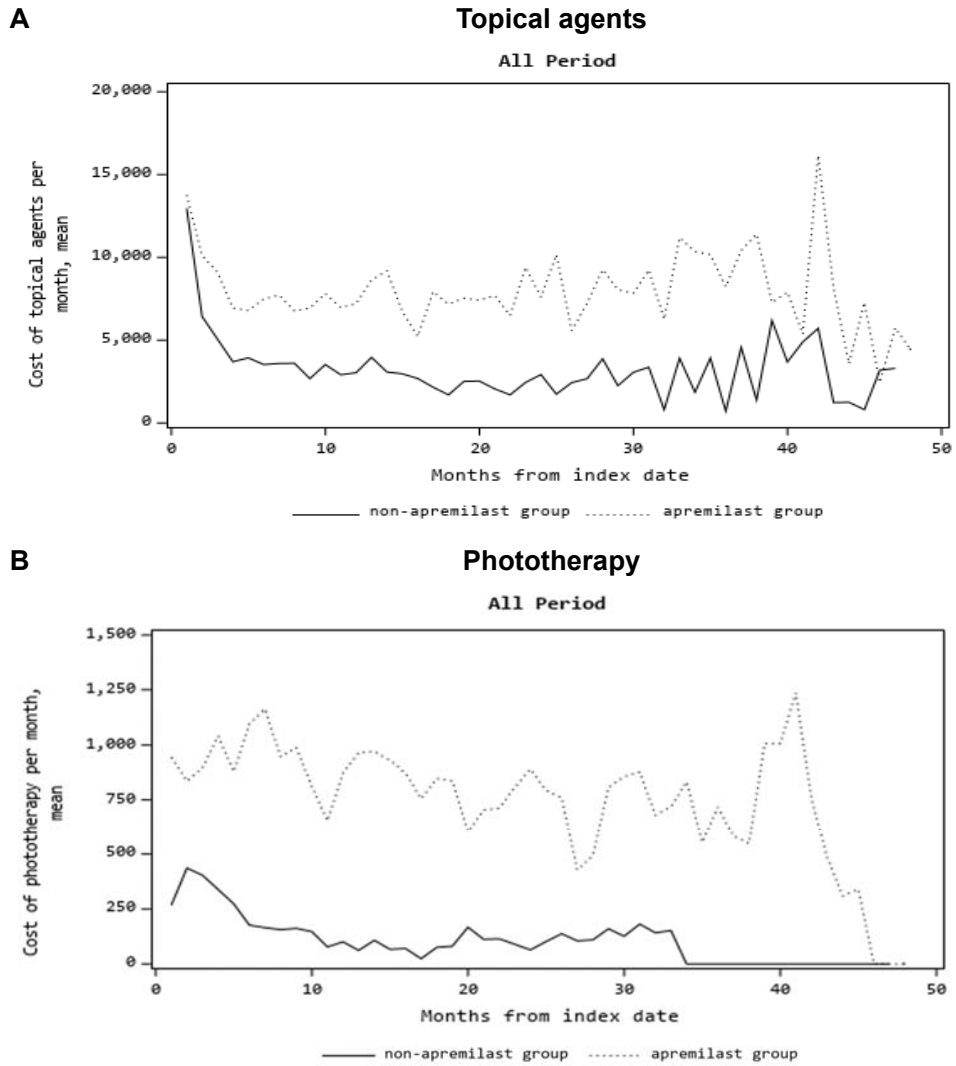

**C**

### Oral agents

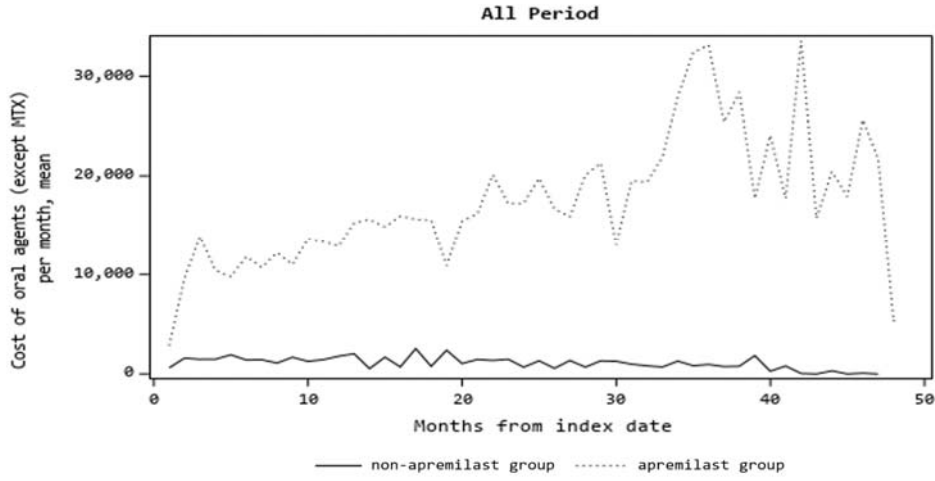

**D**

### MTX

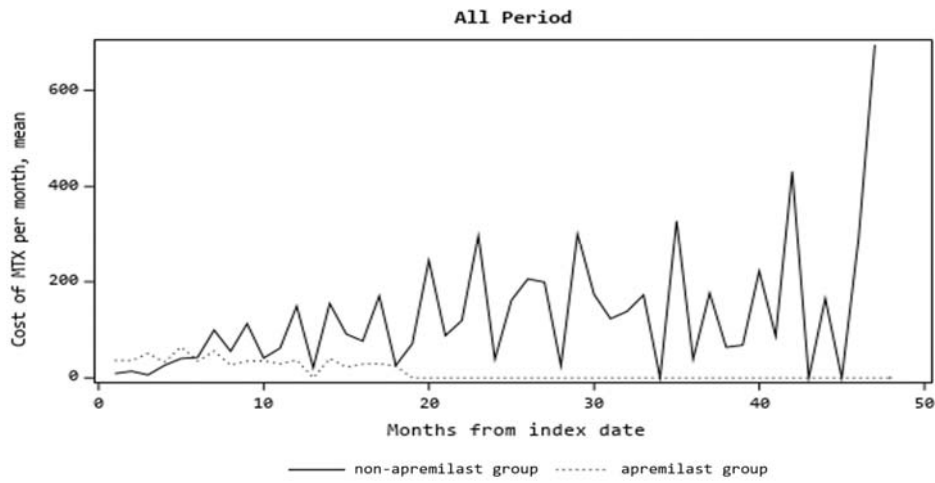

**E**

### Biologic therapy

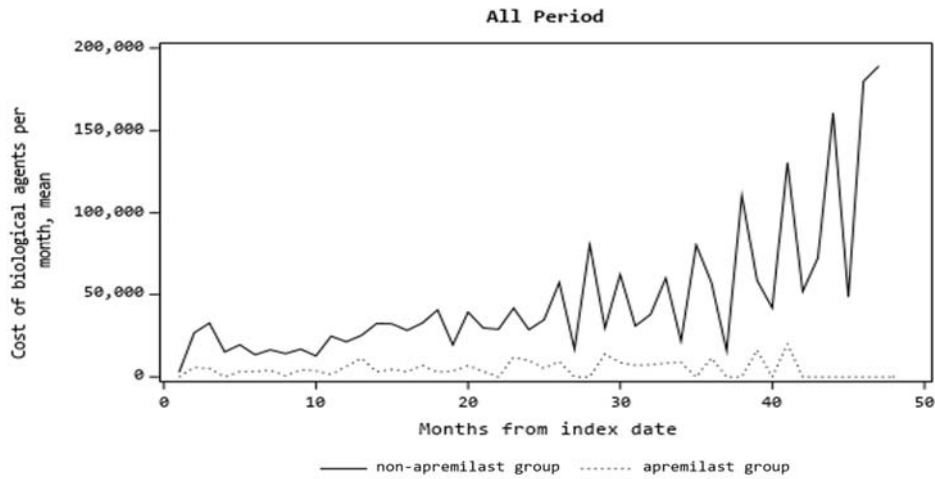

**F**

### Other agents for psoriasis

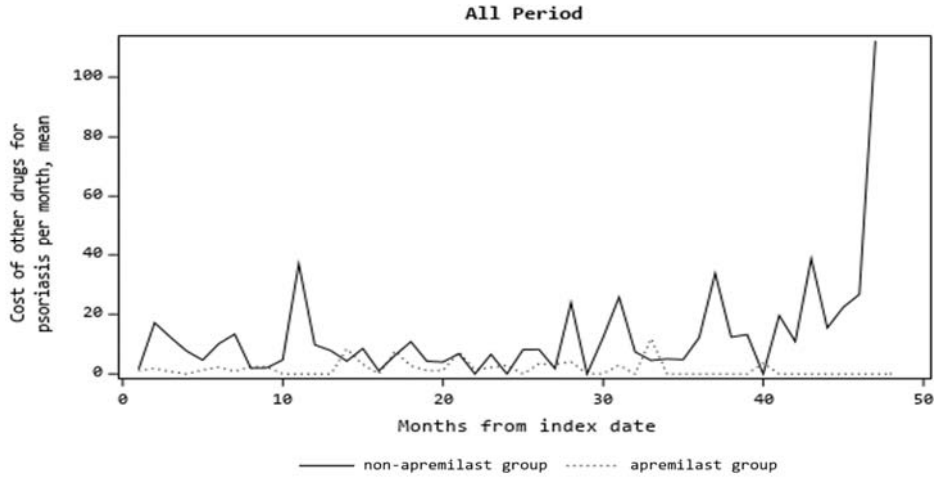

**G**

### Other agents

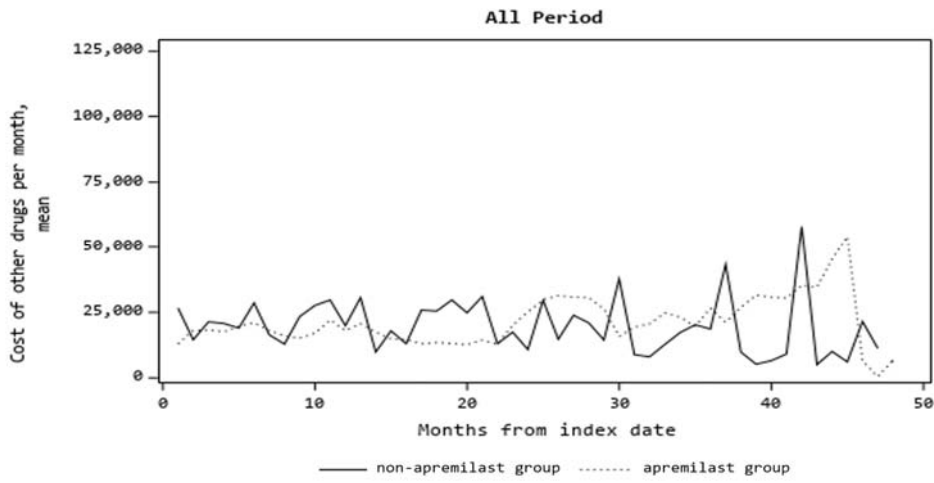

**H**

### Other treatment procedures

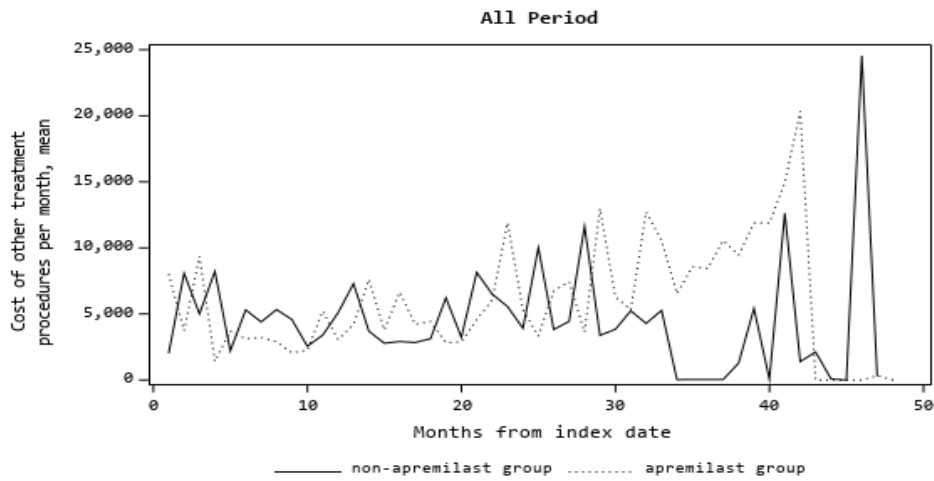

I

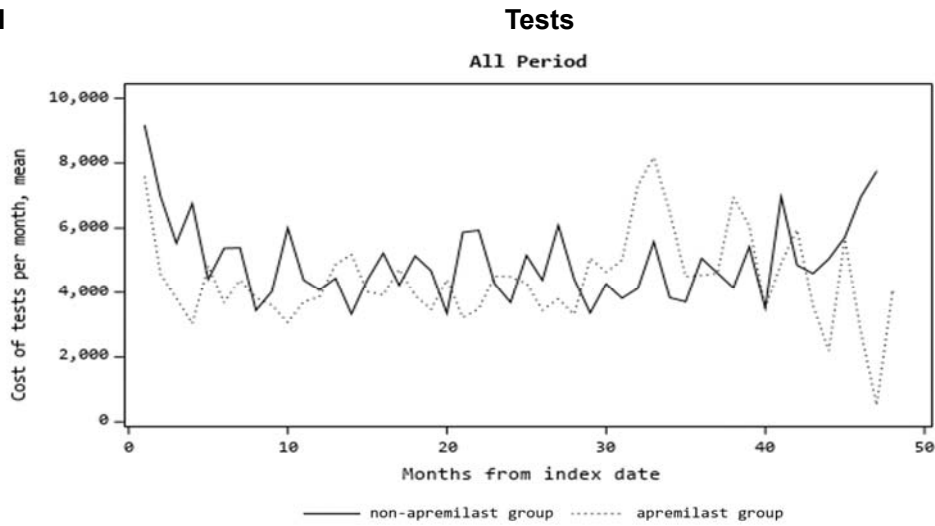

J

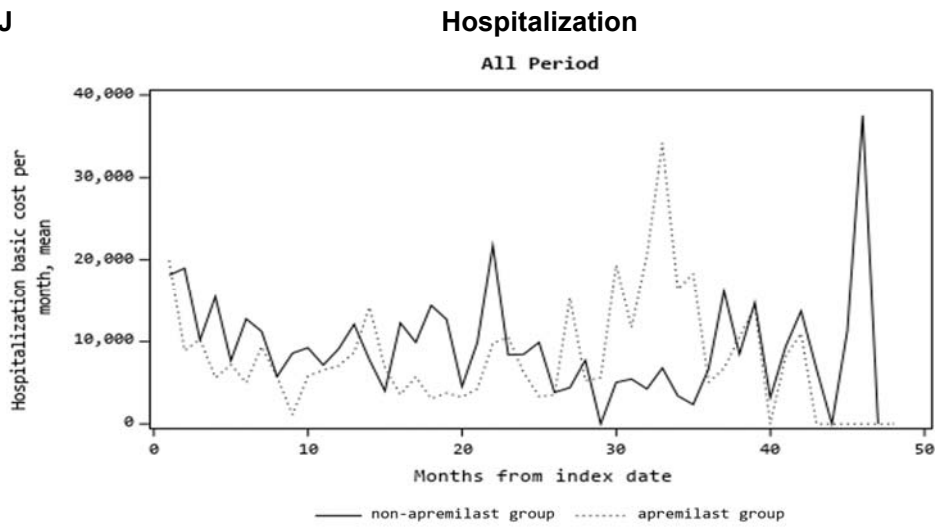

K

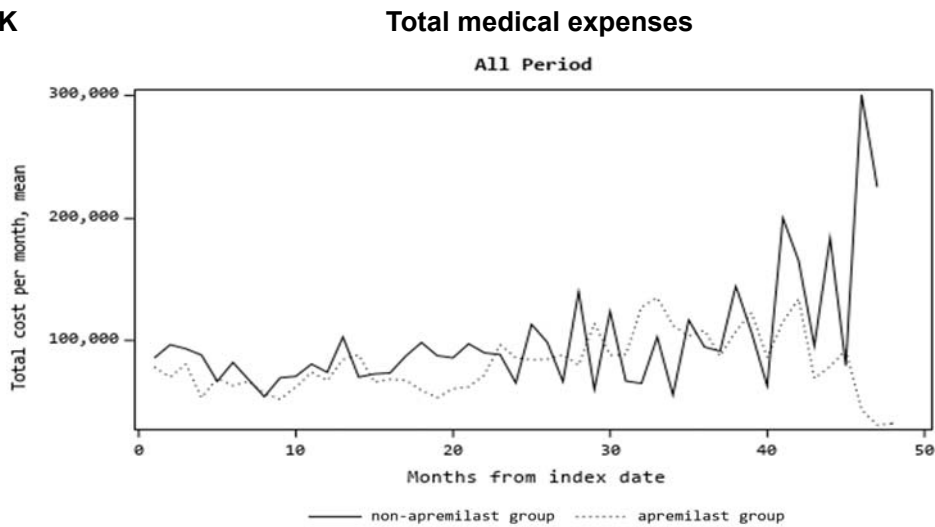

**Fig. S2.** Sensitivity analysis: cumulative incidence of biologic therapy in patients prescribed a biologic during the follow-up period

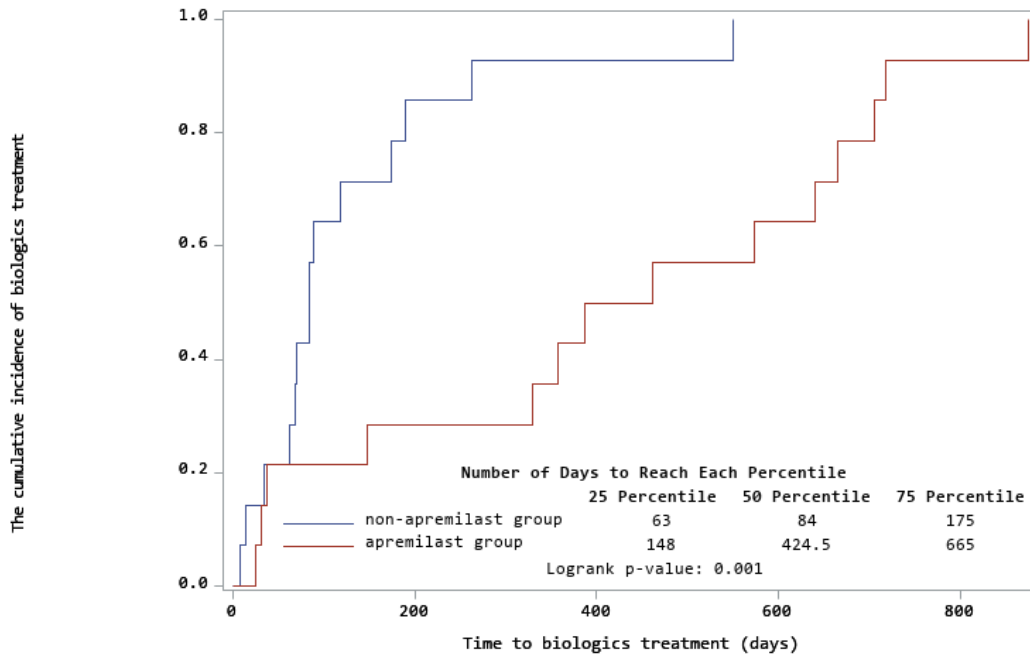

| Number at Risk       |    |     |     |     |     |
|----------------------|----|-----|-----|-----|-----|
|                      | 0  | 200 | 400 | 600 | 800 |
| non-apremilast group | 14 | 2   | 1   | 0   |     |
| apremilast group     | 14 | 10  | 7   | 5   | 1   |

**Fig. S3.** Sensitivity analysis: cumulative incidence of biologic therapy using the inverse probability of treatment weighting method

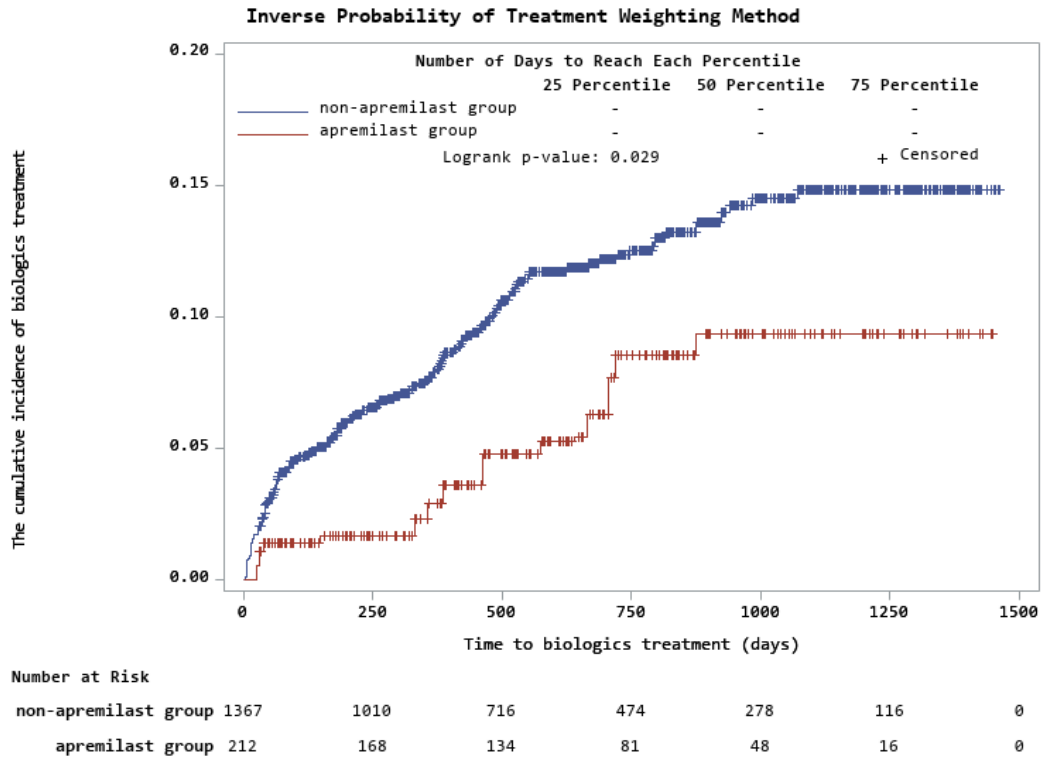



**Table S1.** Patient characteristics before propensity score matching

|                                                                          | Before propensity score matching   |                                          |                           | SMD <sup>a</sup> |
|--------------------------------------------------------------------------|------------------------------------|------------------------------------------|---------------------------|------------------|
|                                                                          | Apremilast group<br><i>n</i> = 254 | Non-apremilast group<br><i>n</i> = 1,381 | Total<br><i>n</i> = 1,635 |                  |
| Age, mean (SD), years, mean (SD)                                         | 63.1 (15.9)                        | 65.3 (15.5)                              | 64.9 (15.6)               | -0.14            |
| Age category, <i>n</i> (%)                                               |                                    |                                          |                           |                  |
| <50                                                                      | 53 (20.9)                          | 250 (18.1)                               | 303 (18.5)                |                  |
| 50-59                                                                    | 40 (15.7)                          | 188 (13.6)                               | 228 (13.9)                |                  |
| 60-69                                                                    | 56 (22.0)                          | 320 (23.2)                               | 376 (23.0)                |                  |
| ≥70                                                                      | 105 (41.3)                         | 623 (45.1)                               | 728 (44.5)                |                  |
| Male, <i>n</i> (%)                                                       | 155 (61.0)                         | 800 (57.9)                               | 955 (58.4)                | 0.06             |
| Disease type, <i>n</i> (%)                                               |                                    |                                          |                           |                  |
| Psoriasis vulgaris                                                       | 250 (98.4)                         | 1,346 (97.5)                             | 1,596 (97.6)              | -0.07            |
| Psoriatic arthritis                                                      | 13 (5.1)                           | 77 (5.6)                                 | 90 (5.5)                  | 0.02             |
| Diagnosis, <i>n</i> (%)                                                  |                                    |                                          |                           |                  |
| Obesity                                                                  | 3 (1.2)                            | 6 (0.4)                                  | 9 (0.6)                   | -0.08            |
| Diabetes                                                                 | 50 (19.7)                          | 407 (29.5)                               | 457 (28.0)                | 0.23             |
| Hypertension                                                             | 53 (20.9)                          | 519 (37.6)                               | 572 (35.0)                | 0.37             |
| Dyslipidaemia                                                            | 48 (18.9)                          | 354 (25.6)                               | 402 (24.6)                | 0.16             |
| Treatment information during the baseline period, mean (SD)              |                                    |                                          |                           |                  |
| Hospitalization frequency                                                | 0.12 (0.40)                        | 0.26 (0.61)                              | 0.24 (0.58)               | -0.27            |
| Length of hospital stay, days                                            | 0.9 (4.2)                          | 3.7 (14.3)                               | 3.3 (13.3)                | -0.26            |
| Number of patients visits                                                | 3.4 (6.0)                          | 6.2 (10.5)                               | 5.8 (10.0)                | -0.33            |
| Direct medical cost, yen                                                 | 181,717 (740,750)                  | 441,936 (893,733)                        | 401,511 (876,610)         | -0.32            |
| Length of follow-up period, months                                       | 20.8 (12.5)                        | 21.7 (13.5)                              | 21.6 (13.3)               | -0.07            |
| Period until oral drug or biologic for psoriasis is prescribed, days     | 289.2 (309.3)                      | 264.4 (284.8)                            | 269.2 (289.8)             | 0.08             |
| Use of psoriasis drug during the follow-up period                        |                                    |                                          |                           |                  |
| Use of topical steroid, <i>n</i> (%)                                     | 250 (98.4)                         | 1,333 (96.5)                             | 1,583 (96.8)              | -0.12            |
| Use of non-steroidal topical agents, <i>n</i> (%)                        | 245 (96.5)                         | 800 (57.9)                               | 1,045 (63.9)              | -1.03            |
| Initial dose of steroid topical agents, mean (SD), g <sup>b</sup>        | 62.2 (53.8)                        | 37.0 (46.3)                              | 40.9 (48.4)               | 0.50             |
| Maximum dose of steroid topical agents, mean (SD), g <sup>b</sup>        | 142.9 (125.5)                      | 72.7 (109.9)                             | 83.6 (115.3)              | 0.59             |
| Average dose of steroid topical agents, mean (SD), g <sup>b</sup>        | 2.61 (3.27)                        | 1.73 (6.67)                              | 1.86 (6.27)               | 0.17             |
| Class of steroid topical agents-initial dose <sup>b</sup> , <i>n</i> (%) |                                    |                                          |                           |                  |
| Strongest                                                                | 46 (18.1)                          | 184 (13.3)                               | 230 (14.1)                |                  |
| Very strong                                                              | 193 (76.0)                         | 773 (56.0)                               | 966 (59.1)                |                  |
| Strong                                                                   | 6 (2.4)                            | 258 (18.7)                               | 264 (16.1)                |                  |
| Medium                                                                   | 5 (2.0)                            | 114 (8.3)                                | 119 (7.3)                 |                  |

|                                                                                          |                   |               |                 |       |
|------------------------------------------------------------------------------------------|-------------------|---------------|-----------------|-------|
| Weak                                                                                     | 0 (0.0)           | 4 (0.3)       | 4 (0.2)         |       |
| Missing                                                                                  | 4 (1.6)           | 48 (3.5)      | 52 (3.2)        |       |
| Class of steroid topical agents-strongest class <sup>b</sup> , <i>n</i> (%)              |                   |               |                 |       |
| Strongest                                                                                | 106 (41.7)        | 388 (28.1)    | 494 (30.2)      |       |
| Very strong                                                                              | 141 (55.5)        | 693 (50.2)    | 834 (51.0)      |       |
| Strong                                                                                   | 1 (0.4)           | 199 (14.4)    | 200 (12.2)      |       |
| Medium                                                                                   | 2 (0.8)           | 52 (3.8)      | 54 (3.3)        |       |
| Weak                                                                                     | 0 (0.0)           | 1 (0.1)       | 1 (0.1)         |       |
| Missing                                                                                  | 4 (1.6)           | 48 (3.5)      | 52 (3.2)        |       |
| Class of steroid topical agents - most frequently used class <sup>b</sup> , <i>n</i> (%) |                   |               |                 |       |
| Strongest                                                                                | 34 (13.4)         | 159 (11.5)    | 193 (11.8)      |       |
| Very strong                                                                              | 198 (78.0)        | 778 (56.3)    | 976 (59.7)      |       |
| Strong                                                                                   | 9 (3.5)           | 263 (19.0)    | 272 (16.6)      |       |
| Medium                                                                                   | 5 (2.0)           | 93 (6.7)      | 98 (6.0)        |       |
| Weak                                                                                     | 0 (0.0)           | 4 (0.3)       | 4 (0.2)         |       |
| Missing                                                                                  | 8 (3.1)           | 84 (6.1)      | 92 (5.6)        |       |
| Initial dose of non-steroidal topical agents, mean (SD), g                               | 56.5 (46.4)       | 24.0 (42.0)   | 29.0 (44.3)     | 0.73  |
| Maximum dose of non-steroidal topical agents, mean (SD), g                               | 109.6 (90.5)      | 44.2 (106.5)  | 54.3 (106.8)    | 0.66  |
| Average dose of non-steroidal topical agents, mean (SD), g                               | 1.96 (2.52)       | 0.87 (2.60)   | 1.04 (2.62)     | 0.43  |
| Total prescription of topical agents, mean (SD), g                                       | 1,316.3 (1,777.4) | 472.3 (976.9) | 603.4 (1,178.4) | 0.59  |
| Prescription of topical agents per day, mean (SD), g                                     | 2.30 (2.63)       | 0.95 (1.86)   | 1.16 (2.06)     |       |
| Use of oral etretinate, <i>n</i> (%)                                                     | 35 (13.8)         | 102 (7.4)     | 137 (8.4)       | -0.21 |
| Use of oral cyclosporine, <i>n</i> (%)                                                   | 9 (3.5)           | 58 (4.2)      | 67 (4.1)        | 0.03  |
| Use of biologics, <i>n</i> (%)                                                           | 14 (5.5)          | 135 (9.8)     | 149 (9.1)       | 0.16  |

<sup>a</sup>Non-apremilast group as reference. <sup>b</sup>Aggregated period for initial dose, maximum dose, class at the start of use and the strongest class: follow-up period; aggregated period for average dose and the most frequently used class: until oral drugs or biologics for psoriasis were presented during the follow-up period  
*SD* standard deviation; *SMD* standardized mean difference

**Table S2.** Sensitivity analysis: incidence rate for the first biologic therapy use for patients in each treatment group prescribed biologics during the follow-up period, matched by the propensity score

|                      | <i>n</i> | Biologic therapy | Person-years | Biologic treatment incidence rate (per 1,000 person-years) |                     | <i>P</i> -value <sup>b</sup> |
|----------------------|----------|------------------|--------------|------------------------------------------------------------|---------------------|------------------------------|
|                      |          |                  |              | Incidence rate                                             | 95% CI <sup>a</sup> |                              |
| Apremilast group     | 14       | 14               | 16.4         | 856.1                                                      | 507.0, 1,445.5      |                              |
| Non-apremilast group | 14       | 14               | 5.0          | 2,797.6                                                    | 1,656.9, 4,723.6    | NA <sup>†</sup>              |

<sup>a</sup>95% CI was calculated using Poisson distribution. <sup>b</sup>*P*-value of chi-square test could not be calculated, because all patients in each group were categorized as having an event  
*CI* confidence interval; *NA* not applicable

**Table S3.** Sensitivity analysis: incidence rate for the first biologic therapy use for patients in each treatment group matched by the inverse probability of treatment weighting method

|                      | <i>n</i> | Biologic therapy | Person-years | Biologic treatment incidence rate (per 1,000 person-years) |                     | <i>P</i> -value <sup>b</sup> |
|----------------------|----------|------------------|--------------|------------------------------------------------------------|---------------------|------------------------------|
|                      |          |                  |              | Incidence rate                                             | 95% CI <sup>a</sup> |                              |
| Apremilast group     | 253      | 13               | 377.5        | 33.5                                                       | 19.3, 58.1          |                              |
| Non-apremilast group | 1,361    | 144              | 2,230.3      | 64.7                                                       | 55.0, 76.2          | 0.037                        |

<sup>a</sup>95% CI was calculated using Poisson distribution. <sup>b</sup>Chi-square test  
*CI* confidence interval

**Table S4.** Sensitivity analysis: healthcare resource utilization for patients in each treatment group matched by the inverse probability of treatment weighting method

|                                              | <b>Apremilast<br/>group, mean (SD)<br/>n = 253</b> | <b>Non-apremilast<br/>group, mean (SD)<br/>n = 1,361</b> | <b>Absolute<br/>difference</b> | <b>P value<sup>a</sup></b> |
|----------------------------------------------|----------------------------------------------------|----------------------------------------------------------|--------------------------------|----------------------------|
| Number of outpatient visits/month            | 1.52 (0.76)                                        | 1.37 (1.30)                                              | 0.15                           | 0.042                      |
| direct medical cost                          |                                                    |                                                          |                                |                            |
| Cost of psoriasis drugs/treatment procedure  |                                                    |                                                          |                                |                            |
| Topical agents, yen/month                    | 7,630 (7,497)                                      | 2,983 (5,663)                                            | 4,647                          | <0.001                     |
| Phototherapy, yen/month                      | 713 (1,796)                                        | 183 (969)                                                | 530                            | <0.001                     |
| Oral drugs (except methotrexate), yen/month  | 17,102 (15,239)                                    | 941 (3,261)                                              | 16,161                         | <0.001                     |
| Methotrexate, yen/month                      | 36 (335)                                           | 80 (509)                                                 | -44                            | 0.026                      |
| Biologic agents, yen/month                   | 5,544 (25,476)                                     | 14,396 (52,749)                                          | -8,851                         | 0.023                      |
| Other drugs for psoriasis, yen/month         | 2 (9)                                              | 35 (220)                                                 | -33                            | < 0.001                    |
| Cost of other drugs, yen/month               | 18,999 (73,707)                                    | 42,180 (104,253)                                         | -23,181                        | < 0.001                    |
| Cost of other treatment procedure, yen/month | 2,386 (6,855)                                      | 9,735 (46,109)                                           | -7,349                         | 0.001                      |
| Cost of tests, yen/month                     | 4,937 (5,067)                                      | 9,284 (15,097)                                           | -4,347                         | < 0.001                    |
| Hospitalization basic cost, yen/month        | 11,656 (27,684)                                    | 35,473 (96,946)                                          | -23,817                        | < 0.001                    |
| Total cost, yen/month                        | 79,874 (97,540)                                    | 135,923 (228,263)                                        | -56,048                        | 0.004                      |

<sup>a</sup>Wilcoxon rank-sum test

SD standard deviation
